# Supplementary material
Source: HighWire-hosted journal article supplement (https://openheart.bmj.com/content/7/2/e001469)
Supplement: inline-supplementary-material-1 [file inline-supplementary-material-1.pdf]

## SUPPLEMENTAL MATERIAL

## Supplemental Table

Suppl. Table 1. Clinical characteristics before discharge in patients with and without all-cause mortality

|                                                 | All-cause mortality |               | <i>P</i> value<br>(- vs. +) |
|-------------------------------------------------|---------------------|---------------|-----------------------------|
|                                                 | - (n = 464)         | + (n = 88)    |                             |
| Age, years                                      | 80 ± 9              | 85 ± 7        | <0.001                      |
| Male sex, n (%)                                 | 216 (47)            | 39 (44)       | 0.700                       |
| Systolic blood pressure, mmHg                   | 120 ± 17            | 120 ± 19      | 0.896                       |
| Diastolic blood pressure, mmHg                  | 66 ± 11             | 65 ± 11       | 0.731                       |
| Heart rate, bpm                                 | 71 ± 13             | 74 ± 14       | 0.085                       |
| Atrial fibrillation, n (%)                      | 166 (36)            | 34 (39)       | 0.608                       |
| Chronic obstructive pulmonary disease, n (%)    | 27 (6)              | 8 (9)         | 0.248                       |
| Coronary artery disease, n (%)                  | 96 (21)             | 22 (25)       | 0.365                       |
| Diabetes mellitus, n (%)                        | 165 (36)            | 29 (33)       | 0.638                       |
| Dyslipidemia, n (%)                             | 203 (44)            | 31 (35)       | 0.138                       |
| Hypertension, n (%)                             | 404 (87)            | 74 (84)       | 0.452                       |
| <b>Laboratory data</b>                          |                     |               |                             |
| Albumin, g/dL                                   | 3.4 ± 0.4           | 3.1 ± 0.5     | <0.001                      |
| eGFR, mL/min/1.73 m <sup>2</sup>                | 43.1 ± 18.6         | 40.3 ± 21.0   | 0.210                       |
| Hemoglobin, g/dL                                | 11.5 ± 2.0          | 10.7 ± 1.8    | <0.001                      |
| N-terminal pro-brain natriuretic peptide, pg/mL | 2309 ± 4834         | 4479 ± 10758  | 0.004                       |
| <b>Echocardiographic data</b>                   |                     |               |                             |
| LAD, mm                                         | 44 ± 8              | 44 ± 8        | 0.808                       |
| LAVI, mL/m <sup>2</sup>                         | 53 ± 24             | 59 ± 29       | 0.075                       |
| LVEDVI, mL/m <sup>2</sup>                       | 54 ± 20             | 56 ± 22       | 0.401                       |
| LVESVI, mL/m <sup>2</sup>                       | 21 ± 11             | 23 ± 13       | 0.262                       |
| SVI, mL/m <sup>2</sup>                          | 32 ± 12             | 33 ± 12       | 0.702                       |
| SV/LAV                                          | 0.72 ± 0.37         | 0.69 ± 0.48   | 0.608                       |
| LVEF, %                                         | 61 ± 8              | 60 ± 8        | 0.319                       |
| TAPSE, mm                                       | 17.8 ± 4.4          | 16.8 ± 4.7    | 0.071                       |
| E/e'                                            | 13.4 ± 5.3          | 15.6 ± 5.9    | <0.001                      |
| Ed/Ea                                           | 0.125 ± 0.050       | 0.147 ± 0.057 | <0.001                      |
| <b>Medications</b>                              |                     |               |                             |

|                                 |          |         |       |
|---------------------------------|----------|---------|-------|
| Beta-blockers, n (%)            | 252 (54) | 51 (58) | 0.528 |
| Calcium-channel blockers, n (%) | 242 (52) | 48 (55) | 0.680 |
| Diuretics, n (%)                | 385 (83) | 76 (86) | 0.432 |
| RAAS inhibitors, n (%)          | 344 (74) | 64 (73) | 0.782 |
| Statins, n (%)                  | 158 (34) | 29 (33) | 0.842 |

Values are presented as means  $\pm$  standard deviations or numbers (%).

eGFR, estimated glomerular filtration rate; LAD, left atrial diameter;

LAVI, left atrial volume index; LVEDVI, left ventricular end-diastolic volume index;

LVESVI, left ventricular end-systolic volume index; SVI, stroke volume index;

SV, stroke volume; LAV, left atrial volume; LVEF, left ventricular ejection fraction;

TAPSE, tricuspid annular plane systolic excursion;

Ed, diastolic elastance; Ea, arterial elastance;

RAAS, renin-angiotensin-aldosterone system

## Supplemental Figure

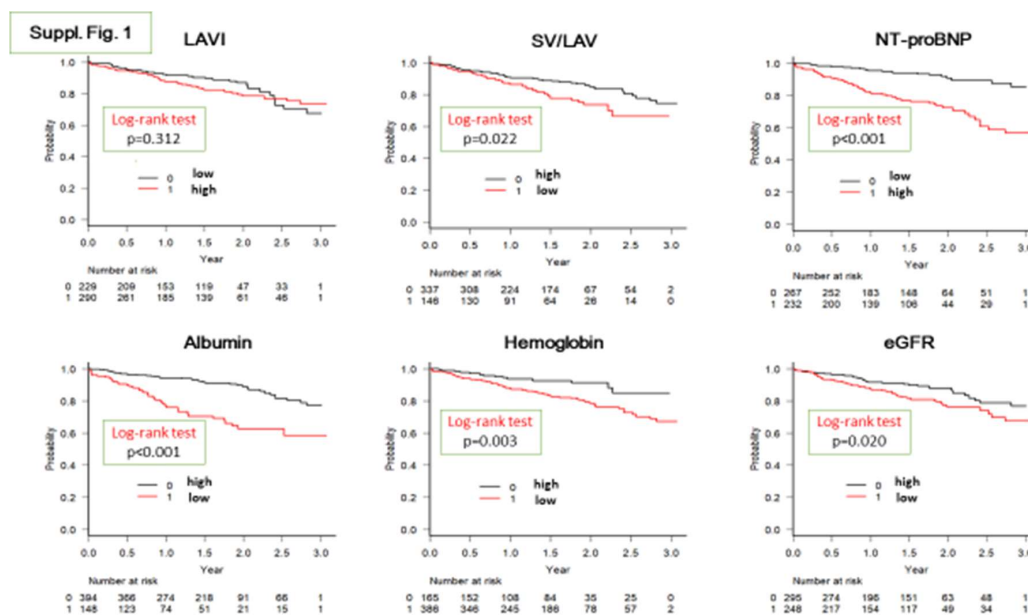

**Suppl. Figure 1.** Kaplan–Meier survival curve analysis of patients with heart failure with preserved ejection fraction shows that the ratio of stroke volume (SV) to left atrial volume (LAV), N-terminal pro-brain natriuretic peptide (NT-proBNP), albumin, hemoglobin, and estimated glomerular filtration rate (eGFR), but not left atrial volume index (LAVI), are significant prognostic factors for all-cause mortality during the whole follow-up time.
